# Supplementary material
Source: HighWire-hosted journal article supplement (https://erj.ersjournals.com/content/55/1/1901181)
Supplement: inline-supplementary-material-1 [file inline-supplementary-material-1.pdf]

**A regimen containing bedaquiline and delamanid compared to bedaquiline alone in patients with drug resistant tuberculosis with poor prognosis**

Olatunde Olayanju<sup>1,\*</sup>, Aliasgar Esmail<sup>1,\*</sup>, Jason Limberis<sup>1</sup>, Keertan Dheda<sup>1,2</sup>

Affiliations: <sup>1</sup>Centre for Lung Infection and Immunity Unit, Division of Pulmonology, Department of Medicine, University of Cape Town, South Africa.

<sup>2</sup> Faculty of Infectious and Tropical Diseases, Department of Immunology and Infection, London School of Hygiene and Tropical Medicine, London, UK

\*Co-first author

Correspondence: Keertan Dheda, Centre for Lung Infection and Immunity Unit, Division of Pulmonology, Department of Medicine University of Cape Town.H46.41 Old Main Building, Groote Schuur Hospital, Observatory,7925 South Africa.

E-mail: [Keertan.dheda@uct.ac.za](mailto:Keertan.dheda@uct.ac.za)

Table S1: Culture conversion status of patients who received bedaquiline-based and those who received bedaquiline-delamanid combination regimens at different time points during treatment. Data is n (%).

|                                 | Patients who received bedaquiline-based regimen (n=82) | Patients who received delamanid-bedaquiline combination regimen (n=40) | p-values |
|---------------------------------|--------------------------------------------------------|------------------------------------------------------------------------|----------|
| Positive at baseline            | 52/82 (63.4)                                           | 26/40 (65.0)                                                           | 0.86     |
| Culture Conversion at 2 months  | 25/38 (65.8)                                           | 13/23 (56.5)                                                           | 0.47     |
| Culture Conversion at 6 months  | 33/36 (92.5)                                           | 18/22 (81.8)                                                           | 0.26     |
| Culture Conversion at 12 months | 27/31 (87.1)                                           | 13/15 (86.7)                                                           | 0.97     |

Patients who were culture negative at the point of recruitment were excluded from the analysis at 2, 6 and 12 months.

Table S2: Comparison of treatment outcomes between patients who received bedaquiline-based regimen and those who received delamanid-bedaquiline combination regimen. Data is (n)%

|                      | Patients who received bedaquiline-based regimen (n=82) | Patients who received delamanid-bedaquiline combination regimen (n=40) | p-values |
|----------------------|--------------------------------------------------------|------------------------------------------------------------------------|----------|
| XDR-TB               | n=67                                                   | n=19                                                                   |          |
| Favourable outcome   | 44 (65.7)                                              | 14 (73.7)                                                              | 0.51     |
| Unfavourable Outcome | 23 (34.3)                                              | 5 (26.3)                                                               |          |
| PRE-XDRTB            | n=10                                                   | n=15                                                                   |          |
| Favourable outcome   | 4 (40)                                                 | 9 (60)                                                                 | 0.32     |
| Unfavourable Outcome | 6 (60)                                                 | 6 (40)                                                                 |          |
| MDR-TB               | n=5                                                    | n=6                                                                    |          |
| Favourable outcome   | 4 (80)                                                 | 4 (66.67)                                                              | 0.62     |
| Unfavourable Outcome | 1 (20)                                                 | 2(33.33)                                                               |          |

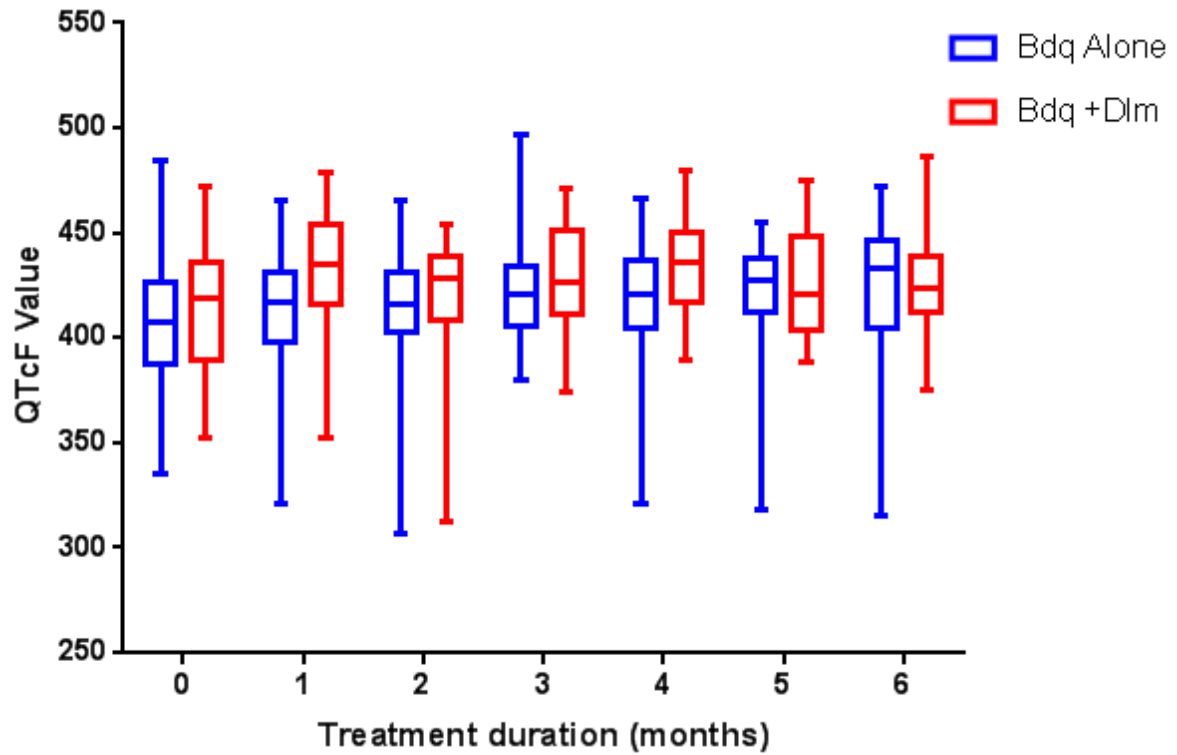

Figure S1: QTcF values at different time points during treatment with either bedaquiline-based regimen or delamanid-bedaquiline combination regimen. Boxes represent the median and IQR, while error bars represent range values

Table S3: (A) Univariate Cox proportional hazard model for developing unfavourable outcome in the HIV-infected patients

| Variables                                                                      | Hazard ratio (95% C.I) | p-value |
|--------------------------------------------------------------------------------|------------------------|---------|
| Age (years)                                                                    | 1.013 (0.960- 1.068)   | 0.64    |
| Gender (male)                                                                  | 1.173 (0.479- 2.871)   | 0.73    |
| Weight (kg)                                                                    | 0.981 (0.945- 1.018)   | 0.31    |
| Age at admission < 50 years                                                    | 0.206 (0.058- 0.734)   | 0.02    |
| Previous TB treatment                                                          | 1.808 (0.748- 4.367)   | 0.19    |
| Days of admission                                                              | 0.993 (0.986- 0.999)   | 0.03    |
| Clofazimine treatment                                                          | 0.596 (0.080- 4.467)   | 0.62    |
| Delamanid treatment                                                            | 0.785 (0.485- 1.269)   | 0.32    |
| Moxifloxacin treatment                                                         | 1.262 (0.484- 3.293)   | 0.64    |
| Levofloxacin treatment                                                         | 0.883 (0.116- 6.717)   | 0.88    |
| Any fluoroquinolone                                                            | 0.047 (0.000-10560)    | 0.63    |
| Linezolid treatment                                                            | 0.416 (0.056- 3.109)   | 0.39    |
| Delamanid-bedaquiline treatment                                                | 0.651 (0.248- 1.706)   | 0.38    |
| Number of medications                                                          | 1.099 (0.847- 1.426)   | 0.48    |
| Number of adverse events                                                       | 1.137 (0.960-1.347)    | 0.14    |
| 5 likely effective drugs                                                       | 0.684 (0.395- 1.183)   | 0.17    |
| Resistant to >5 drugs                                                          | 2.688 (0.762- 9.482)   | 0.12    |
| TTP* < 7 days                                                                  | 1.709 (0.570- 5.119)   | 0.34    |
| SMG <sup>#</sup> > 2 plusses                                                   | 2.270 (0.752- 6.847)   | 0.15    |
| <b>(B) Multivariate Cox proportional hazard model for unfavourable outcome</b> |                        |         |
| Age at admission < 50 years                                                    | 0.333 (0.079-1.396)    | 0.13    |
| Resistant to >5 drugs                                                          | 4.725 (1.041-21.43)    | 0.04    |
| Previous TB treatment                                                          | 2.181 (0.810- 5.871)   | 0.12    |
| Days of admission                                                              | 0.990 (0.982- 0.998)   | 0.02    |
| 5 likely effective drugs                                                       | 0.465 (0.142- 1.520)   | 0.21    |
| Number of adverse events                                                       | 1.173 (0.949- 1.449)   | 0.14    |
| SMG <sup>#</sup> > 2 plusses                                                   | 2.442 (0.690- 8.640)   | 0.17    |

Table S4: Adverse events reported by HIV-infected patients who received bedaquiline-based regimen and those who received delamanid-bedaquiline combination regimen. Data is n (%).

| Adverse event            | Patients who received bedaquiline alone (n=42) | Patients who received bedaquiline and delamanid (n=22) | p-values |
|--------------------------|------------------------------------------------|--------------------------------------------------------|----------|
| Dizziness/disorientation | 5 (11.9)                                       | 4 (18.2)                                               | 0.49     |
| Psychosis                | 2 (4.8)                                        | 4 (18.2)                                               | 0.08     |
| Blurred vision           | 1 (2.4)                                        | 2 (9.1)                                                | 0.23     |
| Hearing loss             | 20 (47.6)                                      | 8 (36.4)                                               | 0.39     |
| Hypothyroidism           | 4 (9.5)                                        | 2 (9.1)                                                | 0.96     |
| Peripheral neuropathy    | 6 (14.3)                                       | 7 (31.8)                                               | 0.098    |
| Anaemia                  | 7 (16.7)                                       | 11 (50)                                                | 0.005*   |
| Diarrhoea                | 3 (7.1)                                        | 4 (18.2)                                               | 0.18     |
| Abdominal pain           | 8 (19.0)                                       | 1 (4.5)                                                | 0.11     |
| Vomiting                 | 11 (26.2)                                      | 4 (18.2)                                               | 0.47     |
| Nausea                   | 9 (21.4)                                       | 3 (13.6)                                               | 0.45     |
| Elevated liver enzyme    | 15 (35.7)                                      | 8 (36.4)                                               | 0.96     |
| Deranged renal function  | 12 (28.6)                                      | 8 (36.4)                                               | 0.52     |
| Arthralgia               | 8 (19)                                         | 3 (13.6)                                               | 0.59     |

\*95.5% of patients in the bedaquiline-delamanid group received linezolid in their regimen compared to 88.1% in the bedaquiline group; linezolid is associated with increased risk of developing anaemia.

A

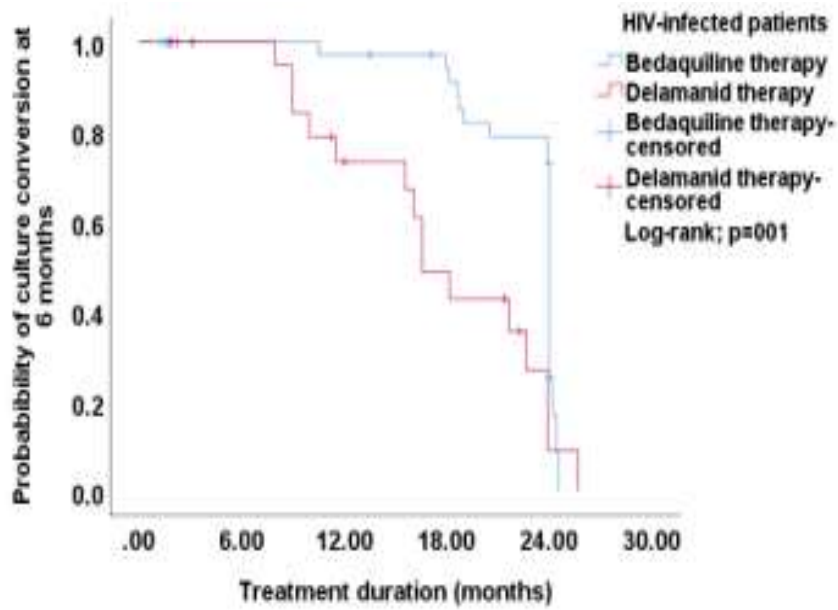

B

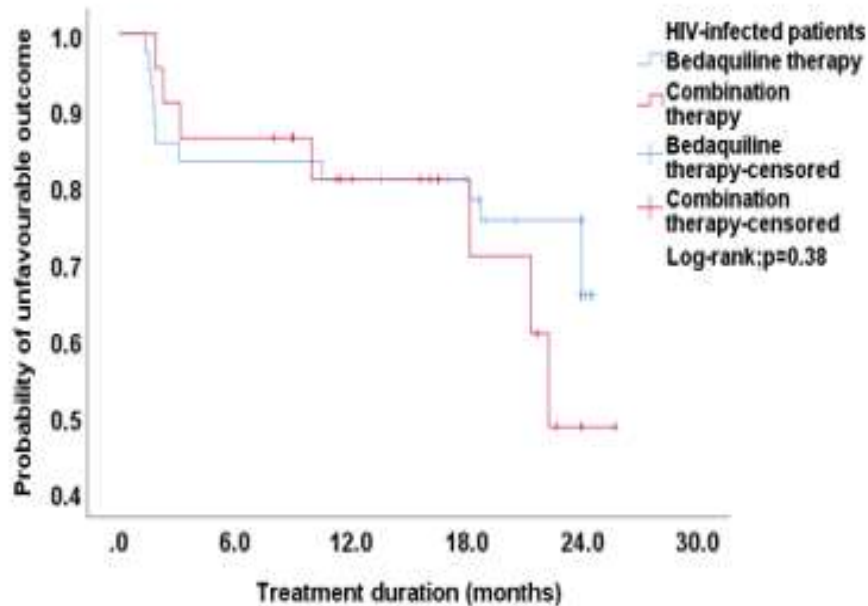

Figure S2 (A): Kaplan Meier estimate for the probability of culture conversion and (B) the probability of achieving an unfavourable outcome in HIV-infected patients who received bedaquiline-alone regimen and those who received delamanid-bedaquiline combination regimen.
